# Supplementary material for: Integrated transcriptomics identifies prognostic significance and therapeutic response of cancer-associated fibroblast subpopulations in ovarian cancer
Source: publisher site journal article supplement (doi:10.18632/aging.205997), 2024-07-01
Supplement: Supplementary file 2 [file aging-v16-205997-supplementary-material-SD1.pdf]

SUPPLEMENTARY FIGURES

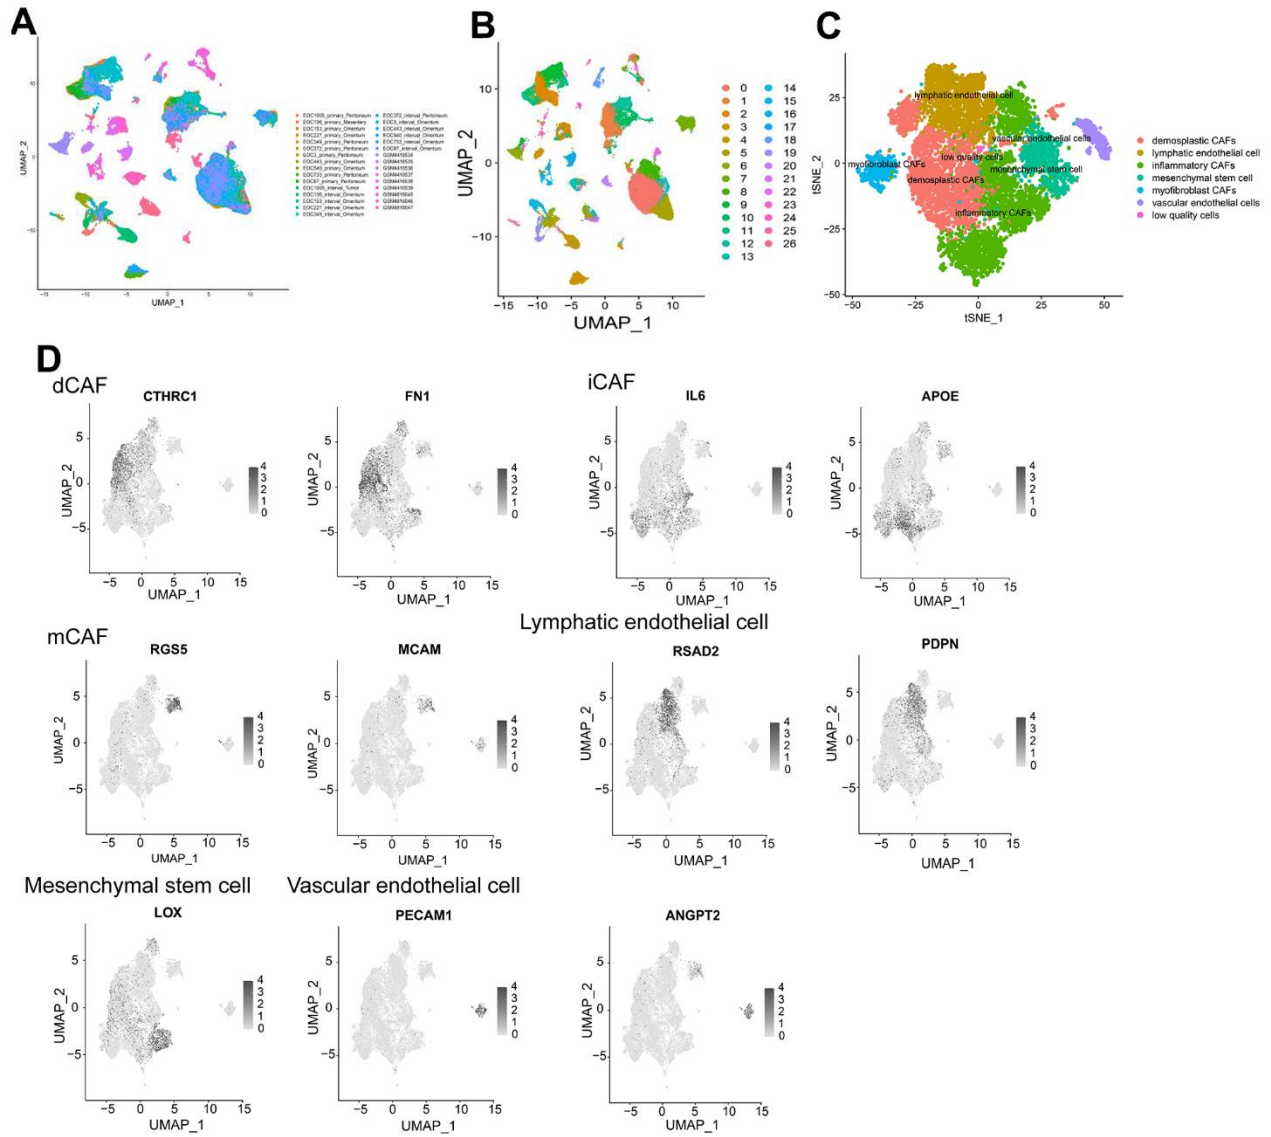

**Supplementary Figure 1. UMAP plot of integrated scRNA-seq data including GSE147082, GSE158937, and GSE165897. (A) UMAP plot of all cells, colored by samples in datasets. (B) UMAP plot of all cells, colored by samples in datasets, colored by Seurat clusters. (C) t-SNE plot of stromal cells, colored by cell types. (D) Feature plot of gene markers of cell types in stromal cells.**

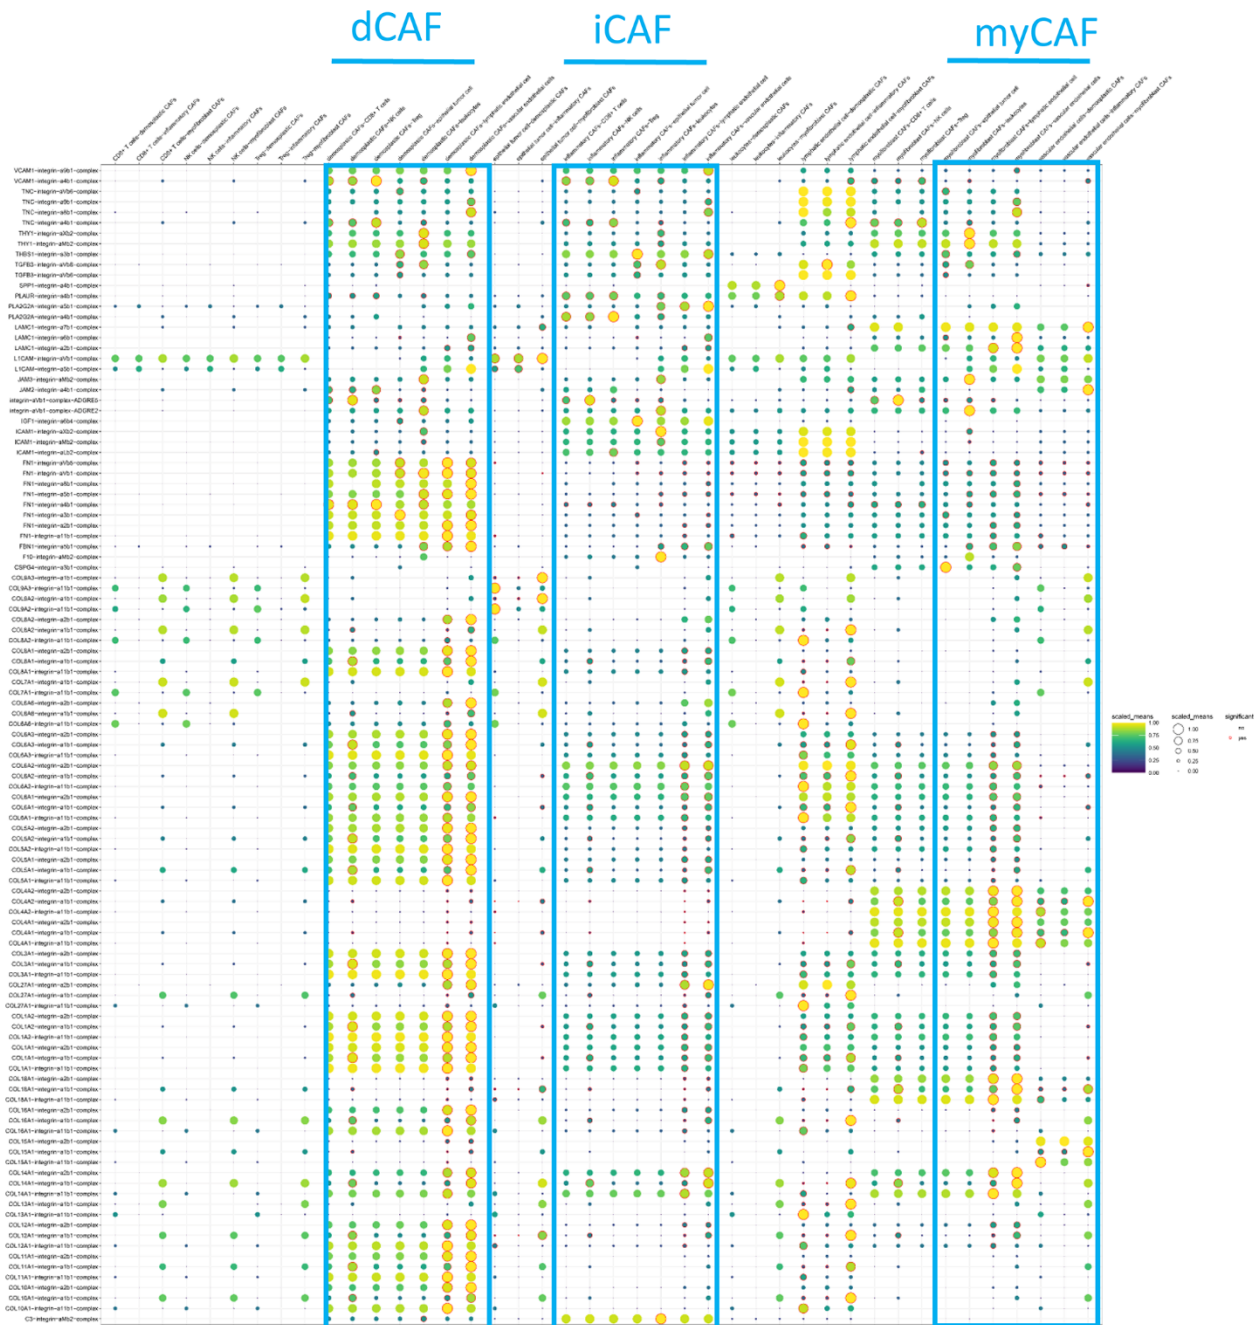

Supplementary Figure 2. ECM-related receptor-ligand pairs between CAF subpopulations and other cell types ( $P < 0.05$ ).

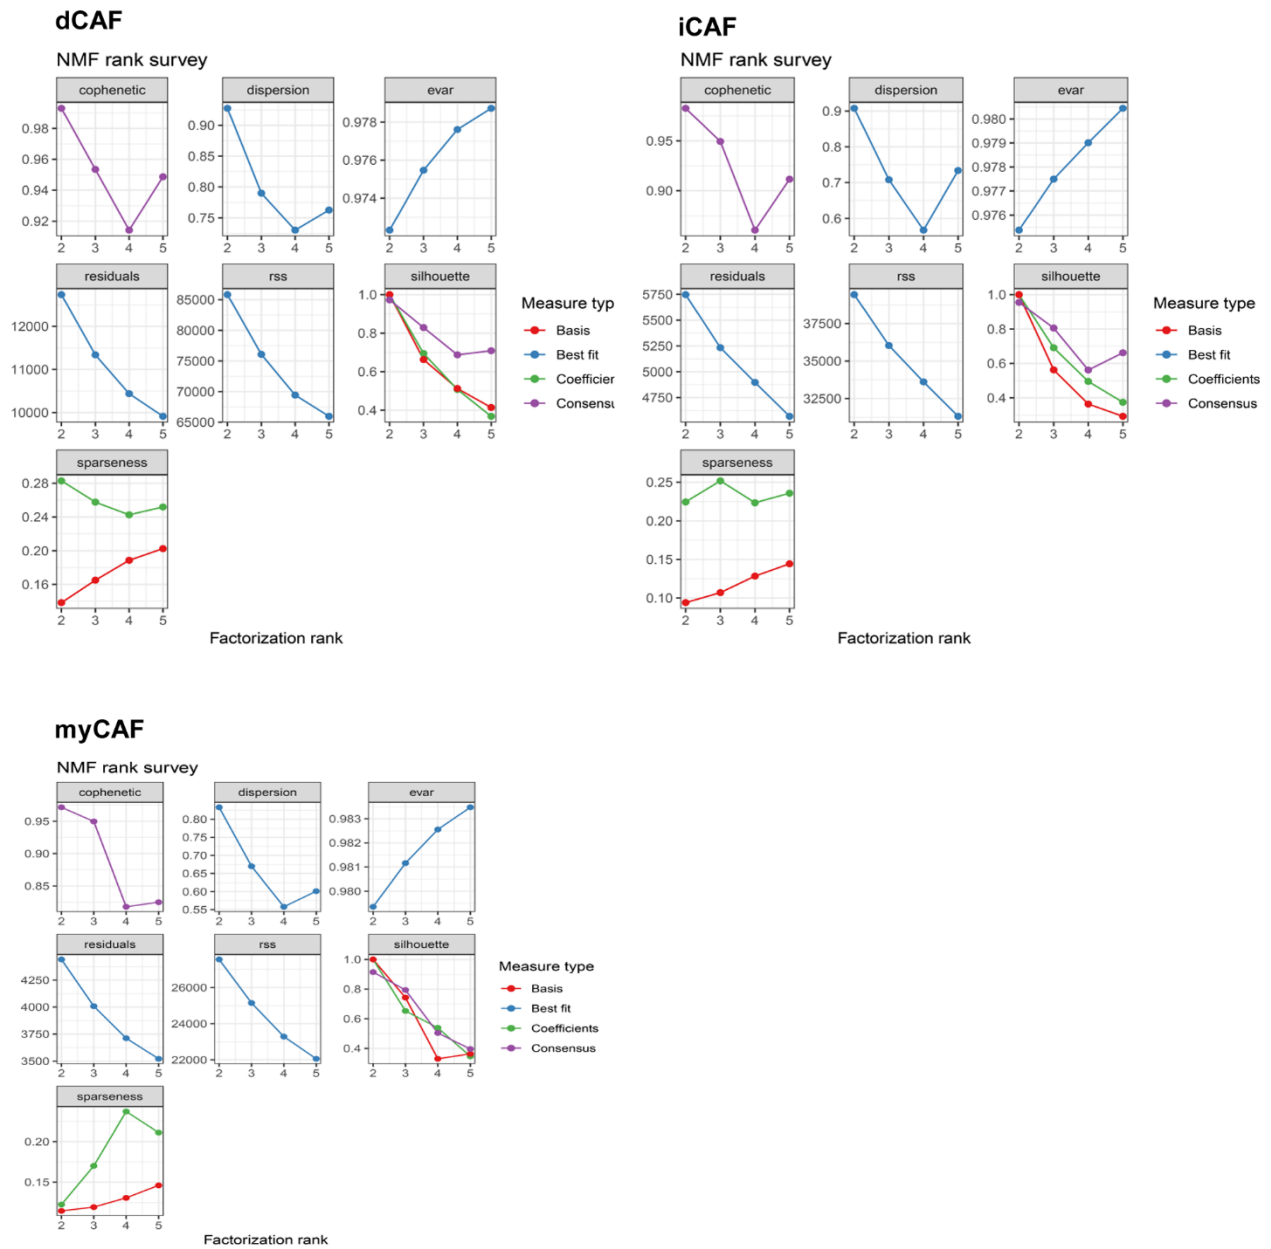

Supplementary Figure 3. Cophenetic, dispersion, evar, residuals, rss, silhouette coefficients, and sparseness concerning the number of clusters in dCAF, iCAF, and myCAF.

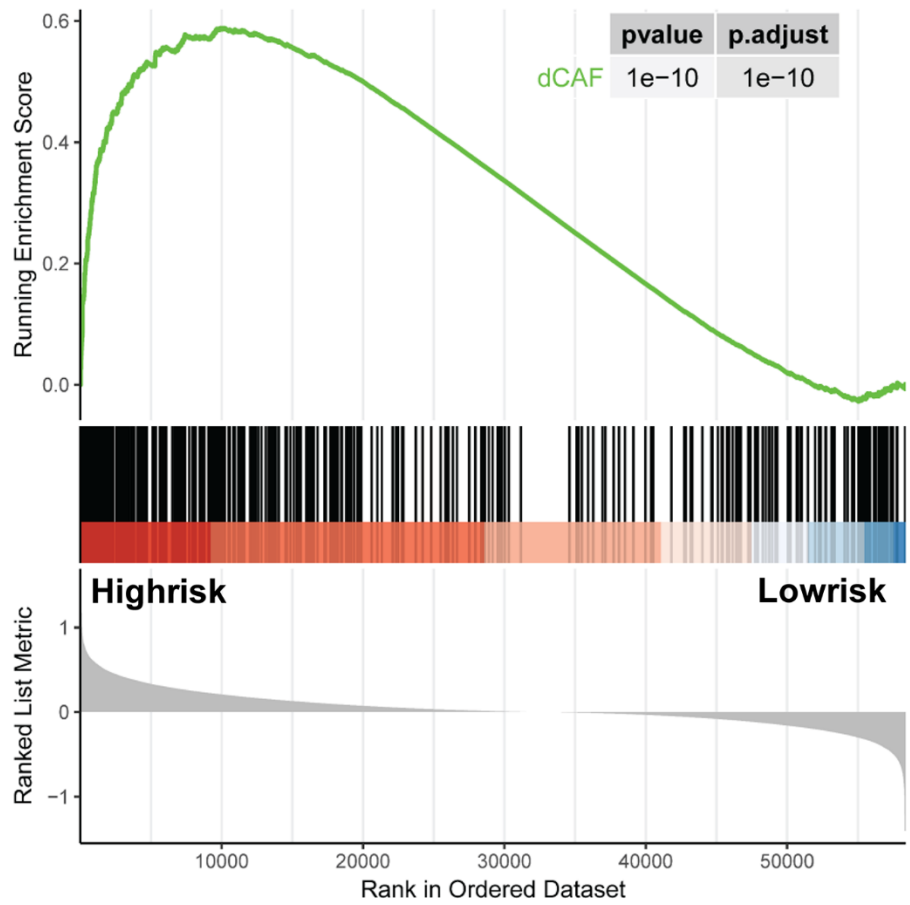

Supplementary Figure 4. GSEA of dCAF marker genes in risk groups.
